# Supplementary material for: Role of adenylyl cyclase 6 in the development of lithium-induced nephrogenic diabetes insipidus
Source: JCI journal article supplement (doi:10.1172/jci.insight.91042), 2017-04-06
Supplement: sd1 [file 1]

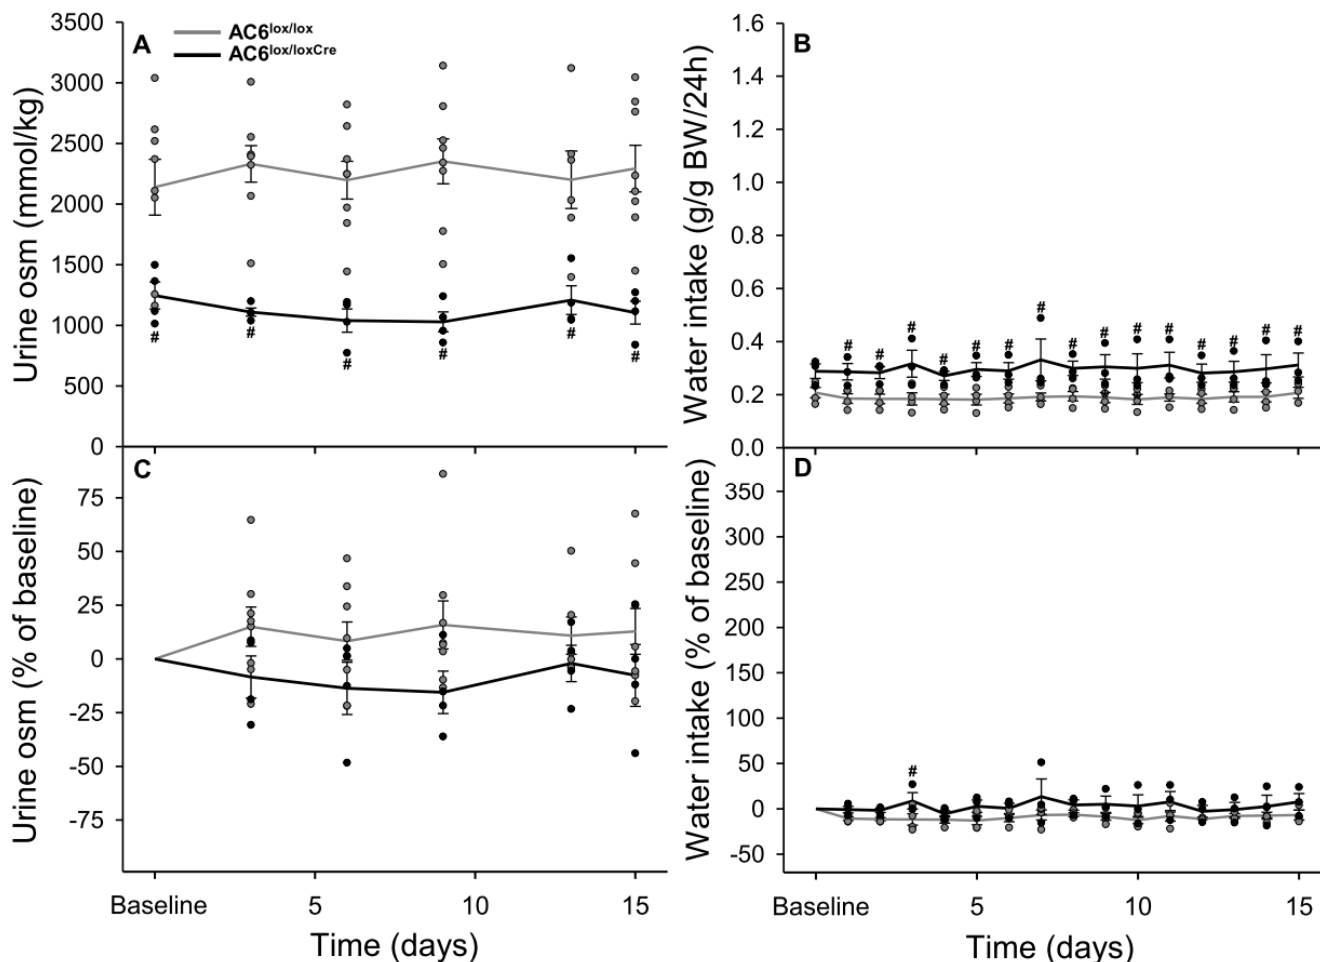

541  
542  
543  
544  
545  
546  
547  
548  
549  
550  
551  
552  
553  
554  
555  
556

**Supplementary Figure S1.  $AC6^{lox/loxCre}$  mice have higher water intake and lower urine osmolality on standard diet than  $AC6^{lox/lox}$  mice.** Following an initial baseline period on standard rodent chow, mice with deletion of adenylyl cyclase 6 (AC6) in aquaporin 2 (AQP2)-expressing cells ( $AC6^{lox/loxCre}$ ) and  $AC6^{lox/lox}$  control mice were kept on a standard diet for 15 days while mice presented in Figure 3 were shifted to a  $Li^+$  diet. Physiological parameters were measured daily. (A) Urine osmolality (osm), (B) water intake (BW = body weight), (C) urine osmolality relative to baseline condition (% of baseline) and (D) water intake relative to baseline condition (% of baseline). Baseline values are averages of the last 1-2 days before mice in figure 3 were switched from standard to  $Li^+$  diet. Water intake and urine osmolality data on day 15 are equivalent to data presented in Figure 4. Values indicate mean  $\pm$  SE. Sample size for urine osmolality:  $AC6^{lox/loxCre}$ ,  $n = 4$ ;  $AC6^{lox/lox}$ ,  $n = 6-8$ . Sample size for water intake:  $AC6^{lox/loxCre}$ ,  $n = 3$ ;  $AC6^{lox/lox}$ ,  $n = 3-4$ . All statistical comparisons were performed using two-way repeated measurements ANOVA followed by Holm-Sidak's post hoc tests. # $AC6^{lox/loxCre}$  vs.  $AC6^{lox/lox}$  ( $P < 0.05$ ).
